# Supplementary material
Source: Springer Nature journal article supplement (https://www.springermedizin.de/resource/supplementary/12879_2012_1717_MOESM3_ESM.pdf/9443986)

**1**

**2**

**3**

**4**

**5**

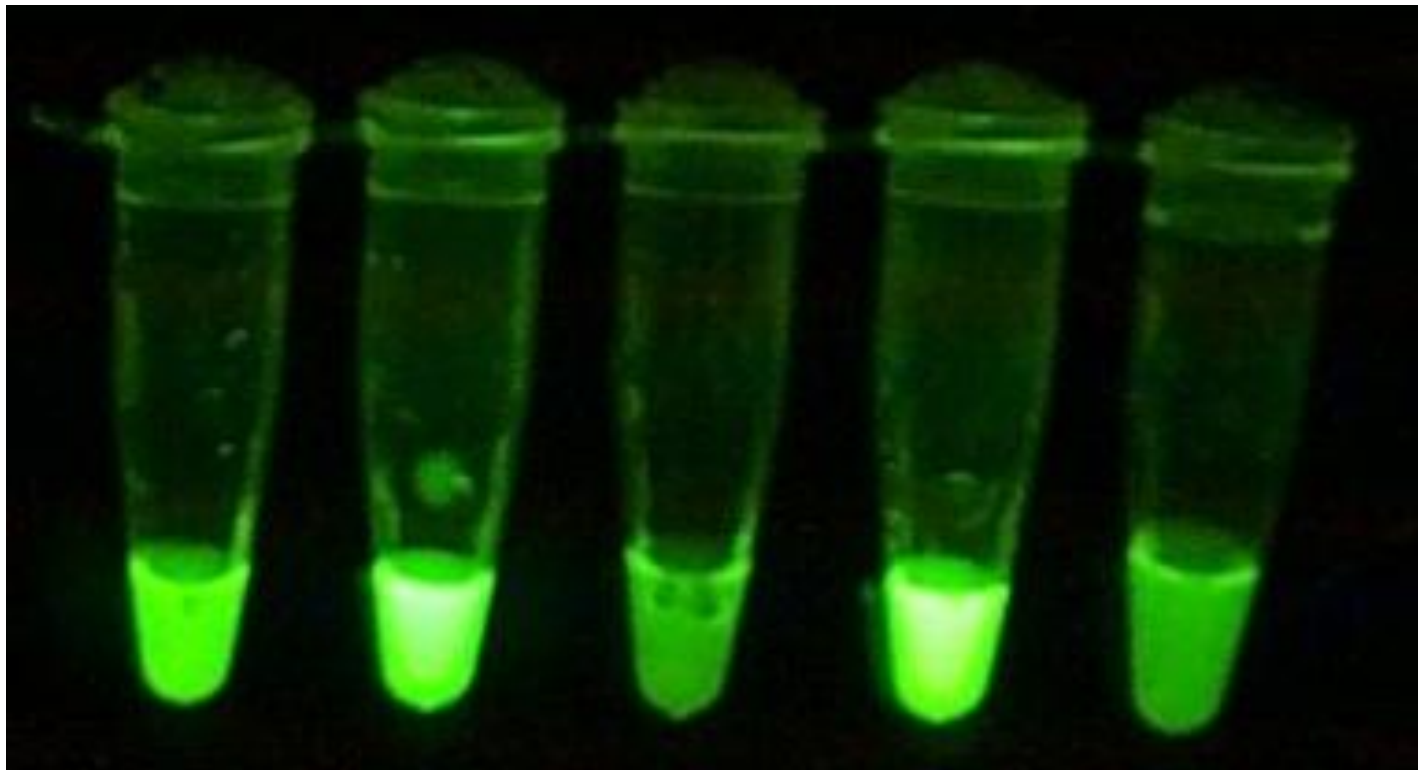

Supplement: MOESM3 [file 9443986]
